# Supplementary material for: CaWRKY22 Acts as a Positive Regulator in Pepper Response to Ralstonia Solanacearum by Constituting Networks with CaWRKY6, CaWRKY27, CaWRKY40, and CaWRKY58
Source: PubMed Central journal article supplement (PMC5983767; doi:10.3390/ijms19051426), 2018-05-10
Supplement: ijms-19-01426-s001.pdf [file ijms-19-01426-s001.pdf]

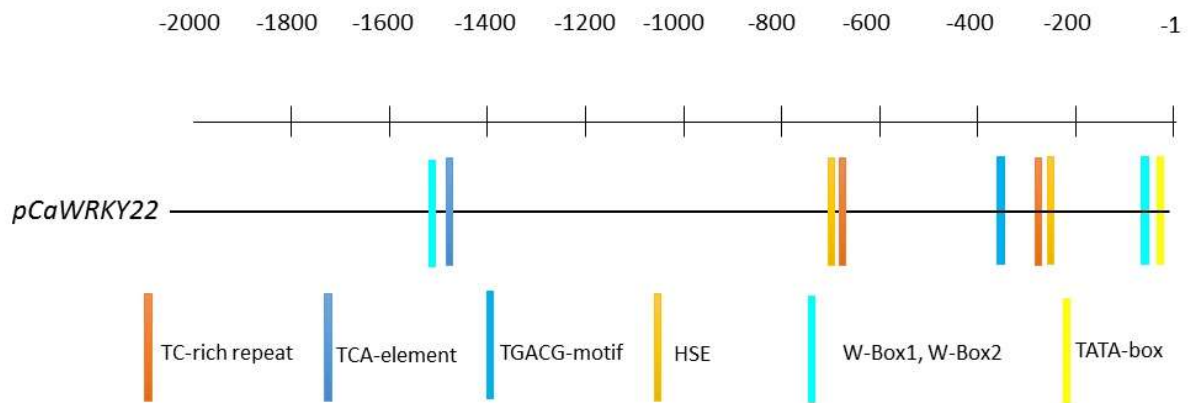

**Supplementary Figure 1. Promoter *cis*-elements analysis of *CaWRKY22***

TCA-element: SA-relative element; TGACG-motif: MeJA-relative element; HSE: heat shock element; W-Box1, W-Box2: transcription factor WRKY binding element.

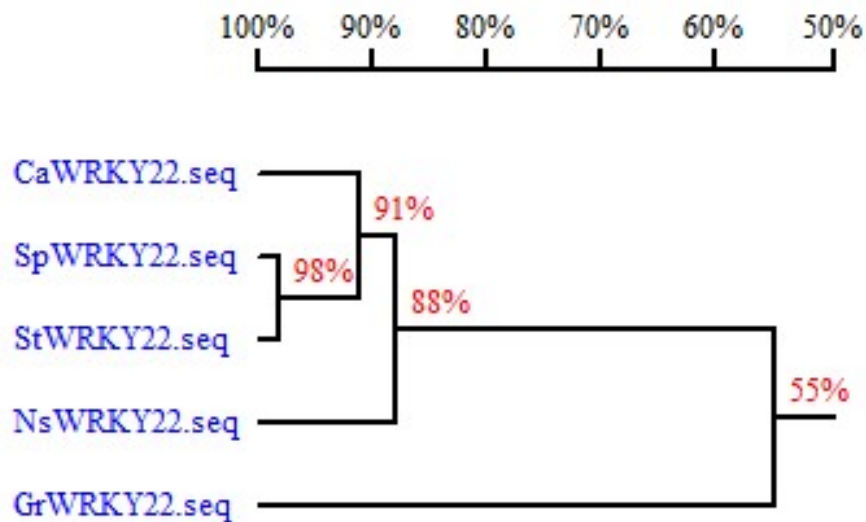

**Supplementary Figure 2. Dendrogram presenting amino acid similarity of *CaWRKY22* and WRKYs from other species**

*CaWRKY22* shares 91%, 91%, 88% and 55% amino acid identities to *SpWRKY22*, *StWRKY22*, *NsWRKY22* and *GrWRKY22* respectively.

## Supplementary Table 1

### Pepper primers used for vectors construction in this study

| Gene                  | Forward primer (5'-3')                                   | Reverse primer (3'-5')                                 | Bps  |
|-----------------------|----------------------------------------------------------|--------------------------------------------------------|------|
| CaWRKY22 <sup>1</sup> | GGGGACAAGTTTGTACAAAAAAGCAGGC<br>TTC ATGGAGGAAGATTGGGATCT | GGGGACCACTTTGTACAAGAAAGCTGGGT<br>CTCAAACACCGCCAGCTGCGG | 1122 |
| CaWRKY22 <sup>2</sup> | GGGACAAGTTTGTACAAAAAAGCAGGC<br>GAGGCTGCACAGCTAGTTCCAC    | GACCACTTTGTACAAGAAAGCTGGGTCGT<br>CCACCAAGAACAGAGAGGGG  | 308  |
| WRKY22 <sup>3</sup>   | GGGGACAAGTTTGTACAAAAAAGCAGGC<br>TTC ATGGAGGAAGATTGGGATCT | GACCACTTTGTACAAGAAAGCTGGGTCAAC<br>CCGCCAGCTGCGGTGG     | 1119 |

---

<sup>1</sup>Primers for full length cloning of *CaWRKY22*

<sup>2</sup>Primers for construction of TRV::*CaWRKY22* vector

<sup>3</sup>Primers for construction of 35S::*CaWRKY22-GFP*

## Supplementary Table 2

### Primers used in Real time RT PCR analyses for this study

| Gene                | Accession number | Forward primers (5'-3')        | Reverse primers(3'-5')           |
|---------------------|------------------|--------------------------------|----------------------------------|
| <i>CaWRKY22</i>     | CA08g07730       | GAGGCTGCACAGCTAGTTCCAC         | CACCAAGAACAGAGAGGGG              |
| <i>CaWRKY40</i>     | AAX20040.1       | AACTTGGATGTTGTGCCTGGA          | CTGTAACCTTGGCTTTTATGTGC          |
| <i>CaHIR1</i>       | AY529867         | GACAAAGCTAATGAAGCATTCTAC       | GGTGTGCAAGTACTGGGTTACC           |
| <i>CaPR4</i>        | AF244122.1       | CAACCCGCAGAACATCAACTGG         | CCTCAAGCATCTACCGCAAGCA           |
| <i>CaActin</i>      | GQ339766         | AGGGATGGGTCAAAGGATGC           | GAGACAACACCGCCTGAATAGC           |
| <i>18srRNA</i>      | EF564281         | CCGGTCCGCCTATGGTGTGCACCGGTCGTC | GCAGTTGTTTCGTCTTTCATAAATCCAAGAA  |
| <i>CaDEF1</i>       | AF442388         | GTGAGGAAGAAGTTGAAAGA<br>AAGTAC | TGCACAGCACTATCATTGCATAC<br>AATTC |
| <i>CaACCoxidase</i> | AB434925.1       | CCATTGTGGTCAACCTTGGC           | GCATCGCTTCCTGGATTGTAA            |
| <i>CaPO2</i>        | DQ489711         | GCCTATGCATTAATGTTGCAAA<br>G    | AGGCAGCATAACGAAGAATT             |
| <i>CaBPRI</i>       | AF053343         | CAGGATGCAACACTCTGGTGG          | ATCAAAGGCCGTTGGTC                |

<sup>1</sup>Specific primers to detect relative expression of *CaWRKY22* designed according to the sequence in

3'UTR Specific primers for marker genes

### Supplementary Table3

#### Pepper Primers Used for ChIP-PCR in This Study

| Gene                        | Forward primers (5'-3') | Reverse primers(3'-5')   |
|-----------------------------|-------------------------|--------------------------|
| <i>CaWRKY22</i> 1W -p       | TCATTTCTCGTCAAATAGAGTA  | GCTGAATGGTGAGATAGTGGTA   |
| <i>CaWRKY22</i> 2W -p       | GAAACCAGCCAAATCACAAACA  | GTTGACCTTC TTAGGGGATA GA |
| <i>CaWRKY40</i> 8/9W-p      | CAAAAGTAGTTTCTGTTTCCAT  | AGAGGCTCATCTGGGTGAATT    |
| <i>pCaPRI</i> 1W-box        | AGCTCCATCCCAAACCAACC    | TGGTGTTGGGTCTGTGAGGC     |
| <i>pCaDEF1</i> 1W-box       | AATCAGTGCCGACTGTGGGG    | GCGCACCTCGGCGCTGAGCT     |
| <i>CaWRKY-22</i><br>OUTSIDE | AAATGGAACGGAGGGAGTAGTA  | TTGGACCTTTTCTTTTATGGGT   |
